# Supplementary material
Source: PubMed Central journal article supplement (PMC3391154)
Supplement: supp_M111.291872_jbc.M111.291872-1.pdf [file supp_M111.291872_jbc.M111.291872-1.pdf]

**Supplemental Data**

**MOLECULAR DETERMINANTS OF GEM INHIBITION OF P/Q-TYPE  $Ca^{2+}$  CHANNELS**

**Mingming Fan<sup>1</sup>, Wei K. Zhang<sup>1</sup>, Zafir Buraei<sup>1</sup>, and Jian Yang<sup>1,2</sup>**

<sup>1</sup>From the Department of Biological Sciences, Columbia University, New York, NY 10027, USA

\*Running title: *Role of two sites in Gem in  $Ca^{2+}$  channel inhibition*

<sup>2</sup>To whom correspondence should be addressed: Jian Yang, Ph.D., Department of Biological Sciences, 917 Fairchild Center, MC2462, Columbia University, New York, NY 10027. Fax: 212-531-0425; E-mail: [jy160@columbia.edu](mailto:jy160@columbia.edu)

# Supplemental Fig. 1

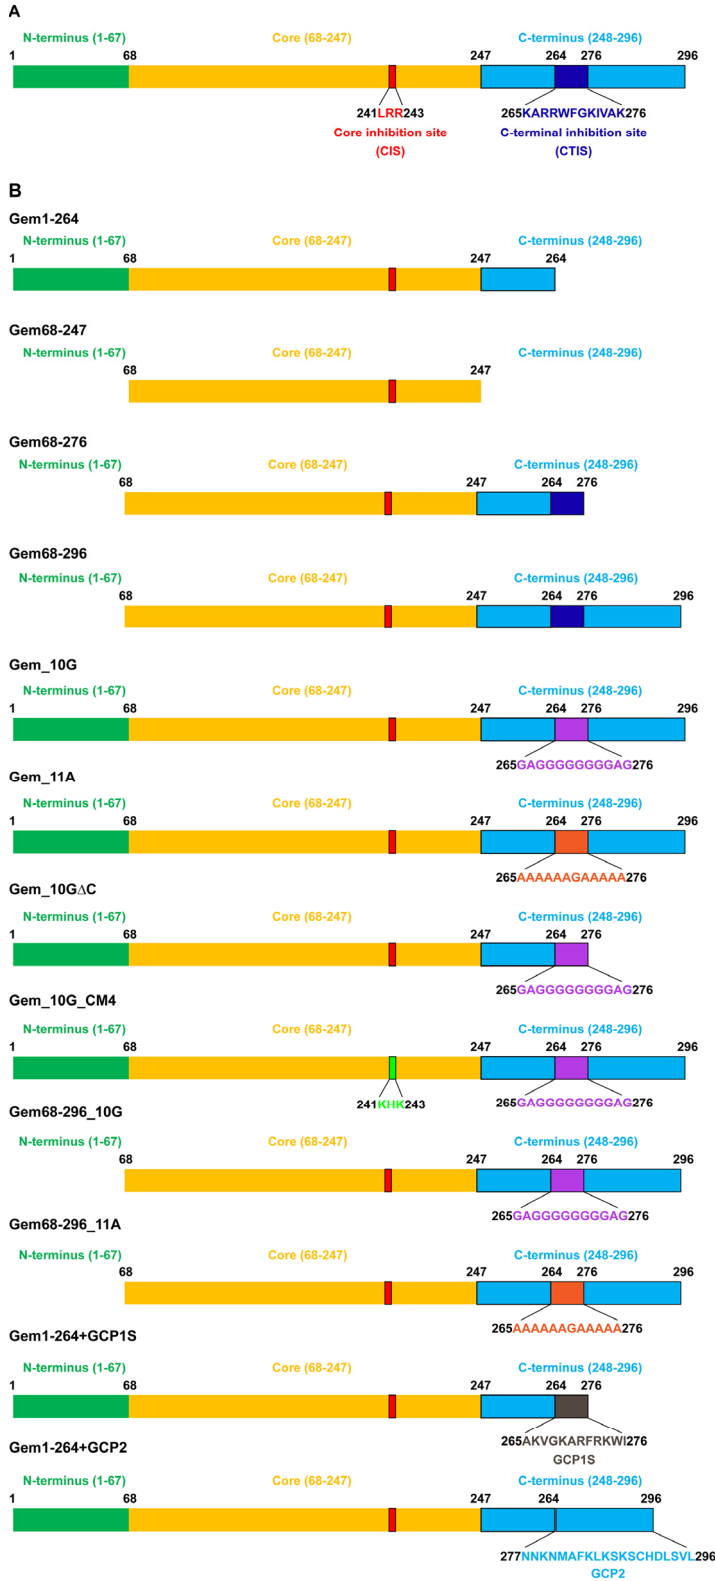

**C**

| Construct      | CTIS intact? | CTIS functional? | CIS intact? | CTIS functional? | Inhibition of P/Q channels? |
|----------------|--------------|------------------|-------------|------------------|-----------------------------|
| Gem_WT         | √            | √                | √           | √                | √                           |
| Gem1-264       | X            | X                | √           | X                | X                           |
| Gem68-247      | X            | X                | √           | X                | X                           |
| Gem68-276      | √            | √                | √           | X                | √                           |
| Gem68-296      | √            | √                | √           | √                | √                           |
| Gem_10G        | X            | X                | √           | √                | √                           |
| Gem_11A        | X            | X                | √           | √                | √                           |
| Gem_10GΔG      | X            | X                | √           | X                | X                           |
| Gem_10G_CM4    | X            | X                | X           | X                | X                           |
| Gem68-296_10G  | X            | X                | √           | √                | √                           |
| Gem68-296_11A  | X            | X                | √           | √                | √                           |
| Gem1-264+GCP1S | X            | X                | √           | X                | √                           |
| Gem1-264+GCP2  | X            | X                | √           | X                | X                           |

**Supplemental Fig. 1.** Summary of the functional effect of selected Gem constructs and the presumed functional state of their C-terminal inhibitory site (CTIS) and core inhibitory site (CIS). (A) Schematic domain organization of WT Gem, marking the location of CTIS and CIS. (B) Schematic of the indicated Gem mutants. (C) Summary of the effect of the indicated Gem constructs on P/Q-type Ca<sup>2+</sup> channel currents and the proposed structural status and functional state of the two Gem inhibitory sites. The last 20 amino acids in the C-terminus form a C-terminal regulatory element that is necessary for the proper function of CIS.
